# Supplementary material
Source: PubMed Central journal article supplement (PMC6178114)
Supplement: 12250_2018_9_MOESM1_ESM.pdf [file 12250_2018_9_MOESM1_ESM.pdf]

VIROLOGICA SINICA

## Electronic Supplementary Material

### **Evaluation of antibody-dependent enhancement of SARS-CoV infection in rhesus macaques immunized with an inactivated SARS-CoV vaccine**

**Fan Luo<sup>1#</sup>, Fan-Lu Liao<sup>2#</sup>, Hui Wang<sup>1</sup>, Hong-Bin Tang<sup>3</sup>, Zhan-Qiu Yang<sup>1</sup>, Wei Hou<sup>1</sup>✉**

1. State Key Laboratory of Virology/Hubei Province Key Laboratory of Allergy and Immunology/Institute of Medical Virology, School of Basic Medical Sciences, Wuhan University, Wuhan 430071, China
2. Department of Clinical Laboratory, Zhongnan Hospital, Wuhan University, Wuhan 430071, China
3. Center for Animal Experiment/Animal Biosafety Level-III Laboratory, Wuhan University, Wuhan 430071, China

#These authors contributed equally to this work.

Supporting information to DOI: 10.1007/s12250-018-0009-2

Supplementary Table S1. Routine blood index of rhesus macaque around immunization

| Items               | Immunized group     |                    | PBS Control        |                   | P  | Reference* |
|---------------------|---------------------|--------------------|--------------------|-------------------|----|------------|
|                     | Before immunization | After immunization | Virus Control      | Negative Control  |    |            |
| WBC ( $10^9/L$ )    | 11.71 $\pm$ 3.35    | 7.37 $\pm$ 1.64    | 10.95 $\pm$ 3.26   | 12.6 $\pm$ 5.48   | NS | 2.6–25.6   |
| RBC ( $10^{12}/L$ ) | 5.27 $\pm$ 0.42     | 5.26 $\pm$ 0.47    | 4.78 $\pm$ 0.27    | 4.94 $\pm$ 0.2    | NS | 4.4–9.4    |
| HGB (g/L)           | 124.25 $\pm$ 8.32   | 114.29 $\pm$ 10.62 | 114.75 $\pm$ 8.07  | 117.67 $\pm$ 4.11 | NS | 98–165     |
| HCT                 | 0.39 $\pm$ 0.028    | 0.4 $\pm$ 0.027    | 0.36 $\pm$ 0.029   | 0.36 $\pm$ 0.008  | NS | 0.36–0.61  |
| MCV (fL)            | 73.13 $\pm$ 2.96    | 75.96 $\pm$ 2.83   | 75.23 $\pm$ 2.57   | 73.3 $\pm$ 2.09   | NS | 66–81      |
| MCH (pg)            | 23.61 $\pm$ 0.79    | 21.43 $\pm$ 0.54   | 24.03 $\pm$ 1.01   | 23.87 $\pm$ 1.11  | NS | 22.2–26.2  |
| PLT ( $10^9/L$ )    | 296.88 $\pm$ 63.43  | 235.58 $\pm$ 77.7  | 261.75 $\pm$ 94.68 | 352 $\pm$ 32.75   | NS | 45–516     |

\* The website from which the range was referenced was <http://www.lascn.net:8080/default.asp>

NS: no significance

WBC: white blood cell; RBC: red blood cell; HGB: hemoglobin; MCH: mean corpuscular hemoglobin; PLT: platelet; HCT: red blood cell-specific volume;

MCV: erythrocyte mean corpuscular volume

Supplementary Table S2 Hematochemical value index of Rhesus macaque around immunization

| Items         | Immunized group     |                    | PBS control     |                  | P  | Reference* |
|---------------|---------------------|--------------------|-----------------|------------------|----|------------|
|               | Before immunization | After immunization | Virus control   | Negative control |    |            |
| ALT (U/L)     | 70.88 ± 25.94       | 56.48 ± 45.52      | 45.63 ± 9.41    | 68.28 ± 17.57    | NS | 15–99      |
| AST (U/L)     | 64.36 ± 12.01       | 41.68 ± 12.22      | 53.18 ± 10.04   | 78.53 ± 18.42    | NS | 21–129     |
| TBiL (Umol/L) | 11.5 ± 4.56         | 3.43 ± 0.93        | 10.4 ± 3.82     | 11.23 ± 2.73     | NS | 2.1–17.1   |
| TP (g/L)      | 75.89 ± 3.26        | 74.23 ± 4.37       | 74.73 ± 3.01    | 73.48 ± 2.39     | NS | 54.9–96    |
| Urea (mmol/L) | 7.2 ± 1.27          | 7.5 ± 1.48         | 8.9 ± 1.89      | 9.13 ± 0.85      | NS | N**        |
| Crea (umol/L) | 75.25 ± 10.7        | 68.5 ± 3.77        | 75.75 ± 6.76    | 79.69 ± 8.11     | NS | 53–147     |
| ALP (U/L)     | 462.21 ± 78.4       | 613.63 ± 280.44    | 587.55 ± 149.81 | 654.65 ± 211.88  | NS | 156–951    |

\* The website from which the range was referenced was <http://www.lascn.net:8080/default.asp>

\*\* There is no reference.

NS: no significance

ALT: alanine aminotransferase; AST: aspartate aminotransferase; TBiL: total bilirubin; TP: total protein

Urea: urea; Crea: creatinine; ALP: alkaline phosphatas
